# Supplementary material for: The 9-1-1 checkpoint clamp coordinates resection at DNA double strand breaks
Source: PubMed Central journal article supplement (PMC4446447; doi:10.1093/nar/gkv409), 2015-04-29
Supplement: supp_gkv409_nar-03105-d-2014-File010.pdf [file supp_gkv409_nar-03105-d-2014-File010.pdf]

## SUPPLEMENTARY FIGURE LEGENDS

### Figure S1.

**(A,B)** Analysis of 3' ssDNA accumulation following DSB induction (A) and telomere uncapping (B) at the indicated loci. The data plotted are the means and the range from two strains (data from B taken from Ngo et al, 2014).

### Figure S2.

Analysis of 3' ssDNA accumulation following telomere uncapping (at 32°C and 34°C) in the presence of nocodazole. The data plotted are the means from one strain.

### Figure S3.

**(A)** Analysis of 3' ssDNA accumulation in JKM179 strains at the indicated loci. (N.B. all strains were in a *pif1Δ* background to suppress the lethality caused by deleting *DNA2*). **(B)** ChIP analyses of Rad9-HA recruitment at the indicated loci near DSBs. **(C-D)** ChIP analyses of Rad9-HA recruitment to control loci after DSB induction (C) and telomere uncapping (D). The data plotted are the means and the range from two strains. P values were calculated using unpaired two-tailed T test. \* represents  $P < 0.05$ , \*\* represents  $P < 0.01$ .

### Figure S4.

Analysis of 3' ssDNA accumulation in *rad9Δ* background strains at the indicated loci. All strains have *pif1Δ* mutations. The data plotted and the p values are as described in Figure S3.

### Figure S5.

3' ssDNA accumulation in the indicated strains relative to wild type (data from Figure 2,4,5). The data plotted are the means and the range from two strains.

### Figure S6.

3' ssDNA accumulation in the indicated strains relative to wild type (data from Figure 2,4,5). The data plotted are the means and the range from two strains.

### Figure S7.

**(A)** ChIP analyses of Exo1-Myc recruitment to the indicated loci relative to a control locus following DSB induction in JKM179 background strains. The data plotted and the p values are as described in Figure S3. **(B,C)** ChIP analysis of Mec3-Myc and Ddc1-Myc recruitment to DSBs in JKM179 background strains. The data plotted are the means from one strain. **(D)** The efficiencies of DSB induction in the indicated strains at the *URA3* locus. **(E)** ChIP analyses of Rad9-HA recruitment at a control locus after DSB induction. The data plotted in D,E are the means and the range from two strains.

**Table S1.** Yeast strains used in the study.

**Table S2.** Yeast strains used in the study.

**Table S3.** DNA oligonucleotides used in the study.

**Table S4.** DNA oligonucleotides used in the study.

Figure S1

**A**

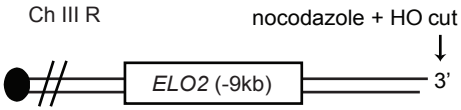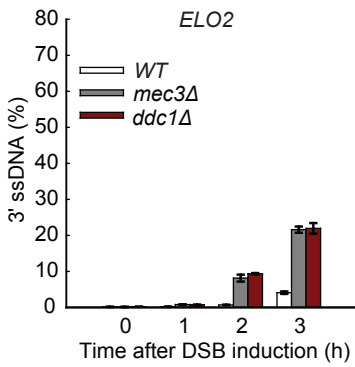

**B**

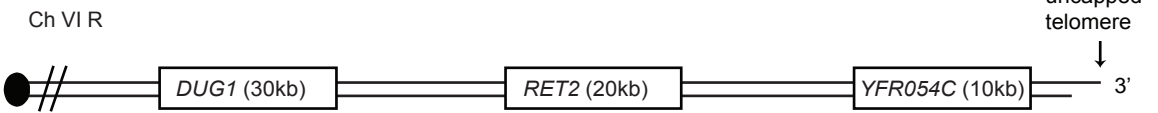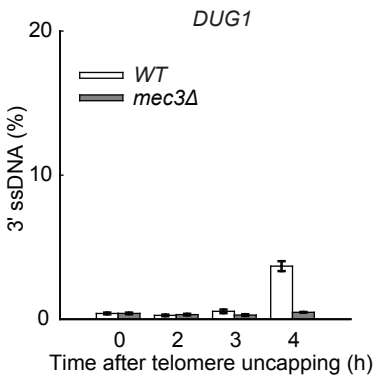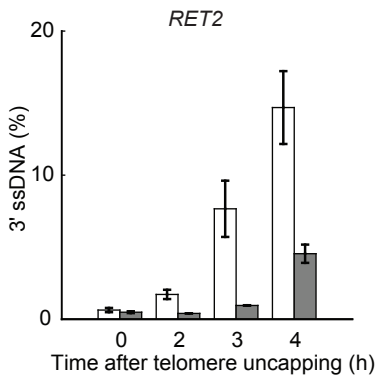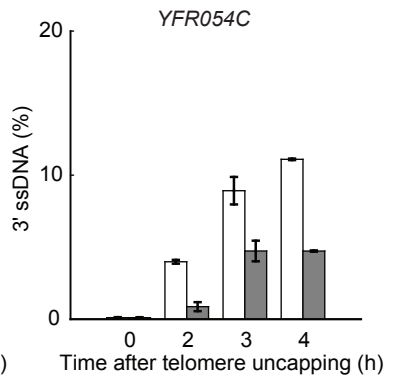

Figure S2

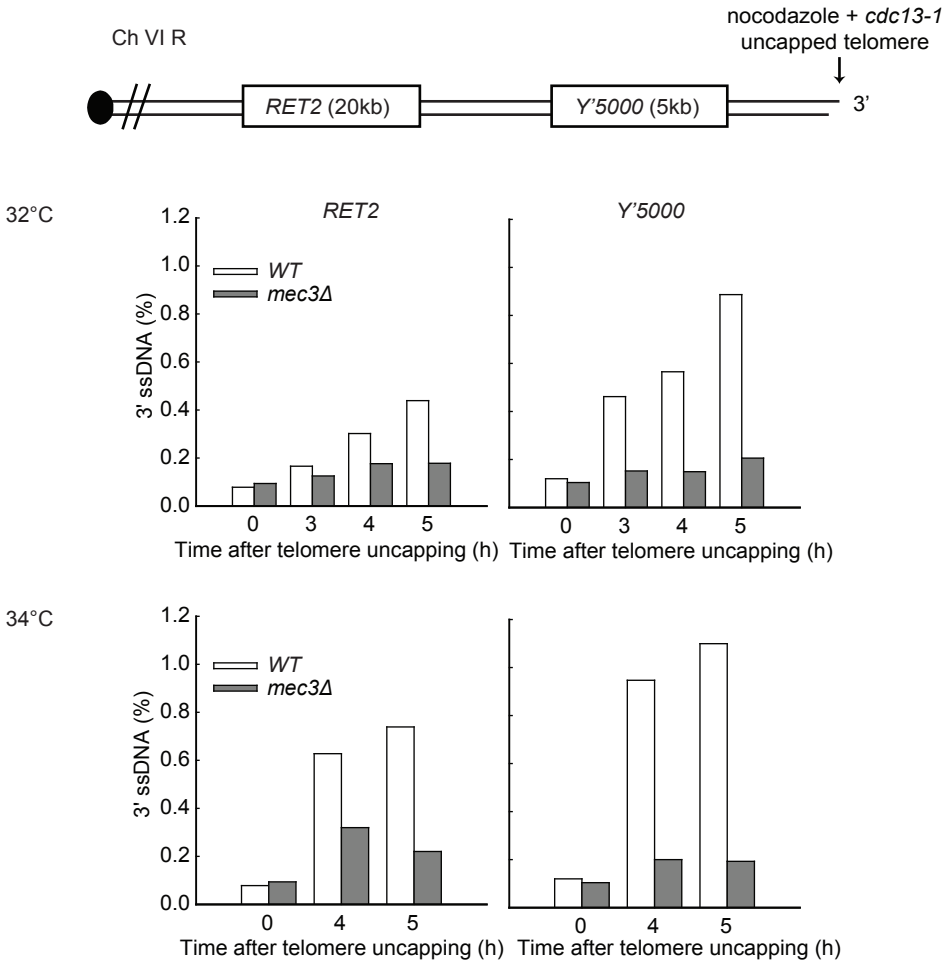

Figure S3

**A**

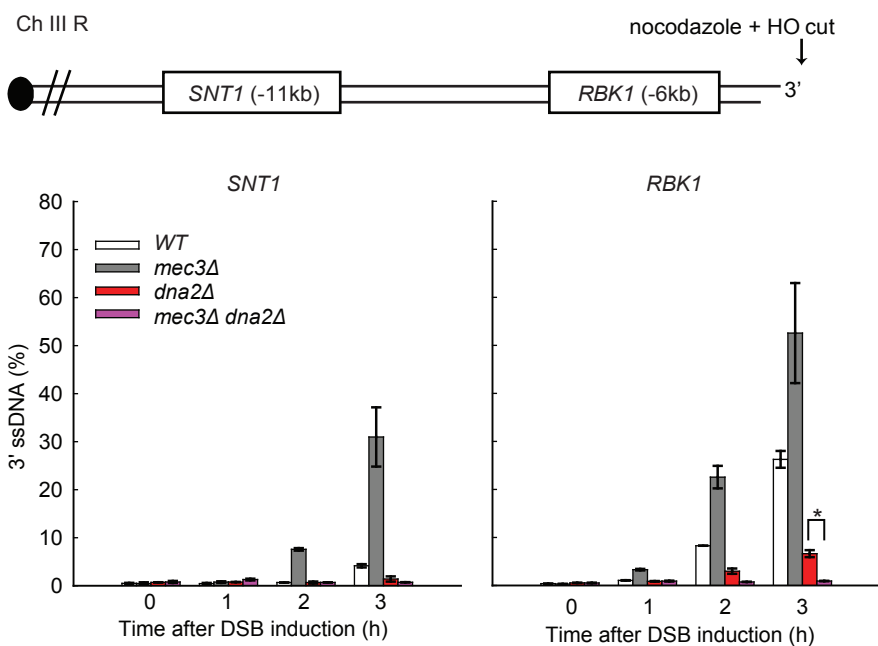

**B**

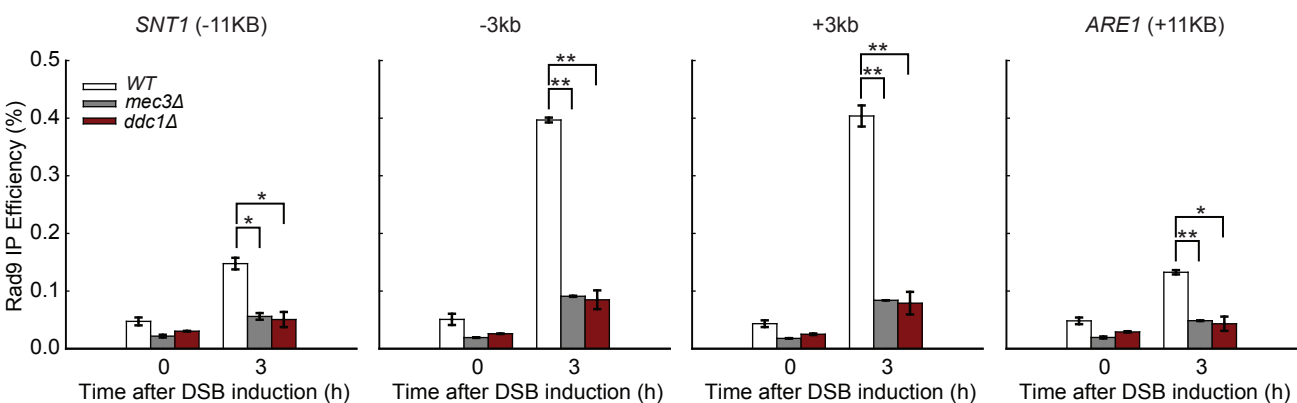

**C**

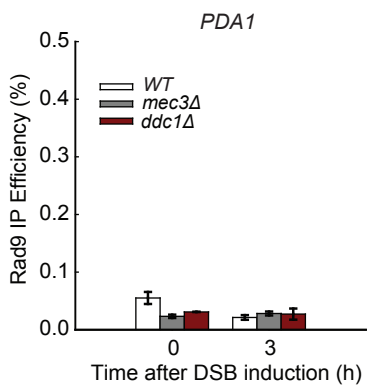

**D**

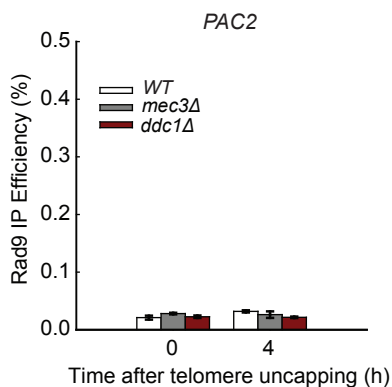

Figure S4

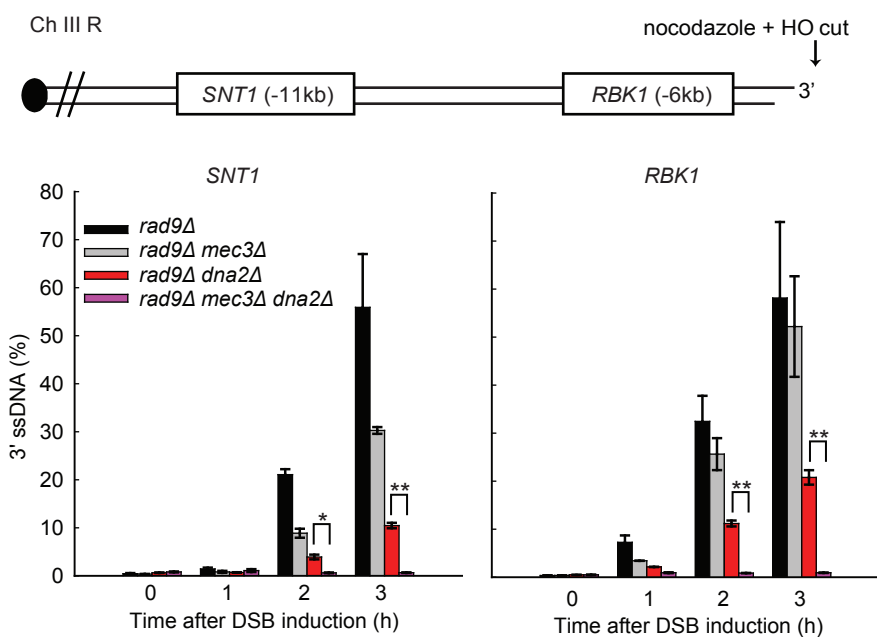

Figure S5

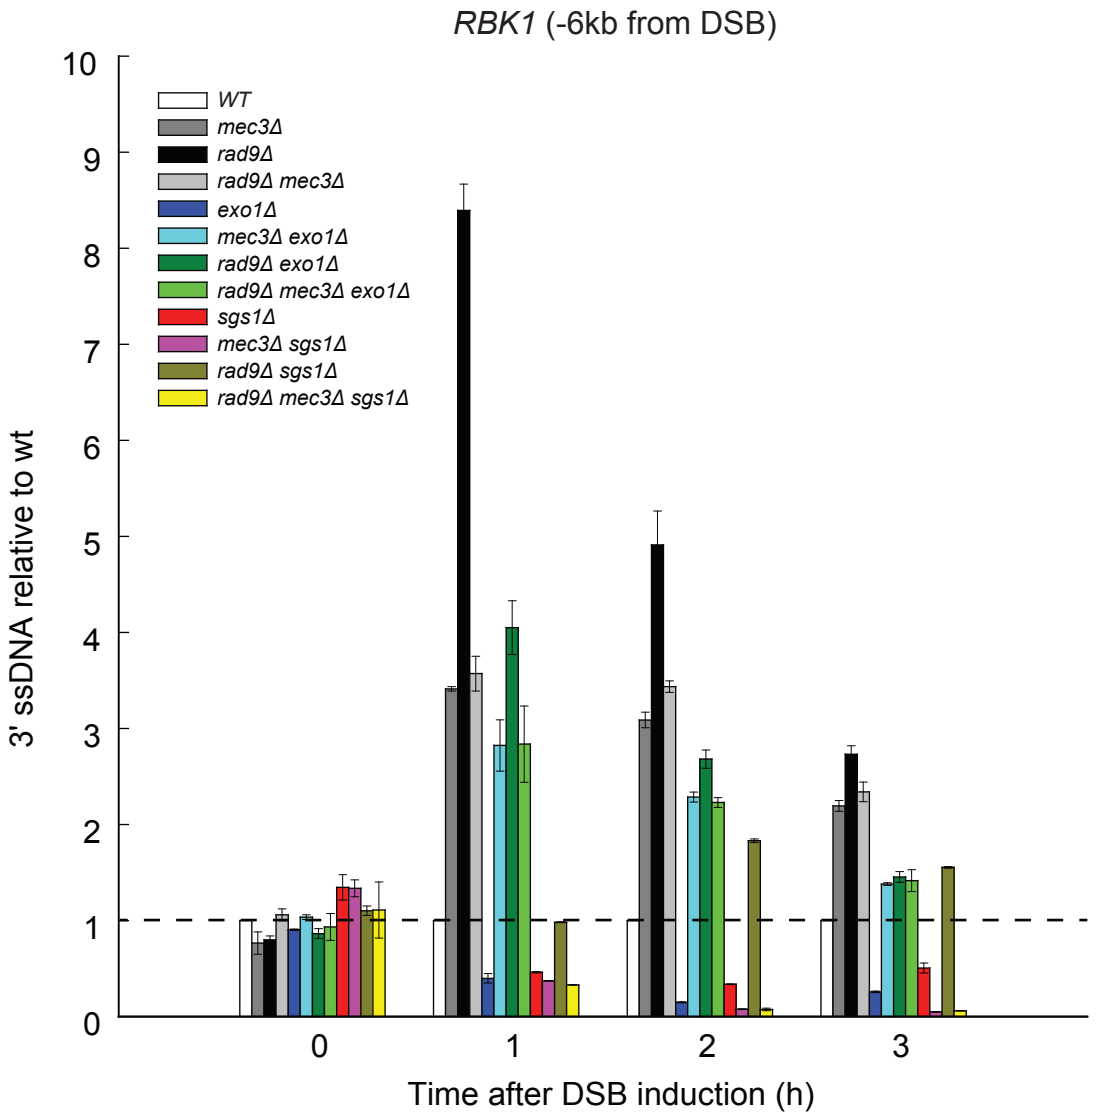

Figure S6

*SNT1* (-11kb from DSB)

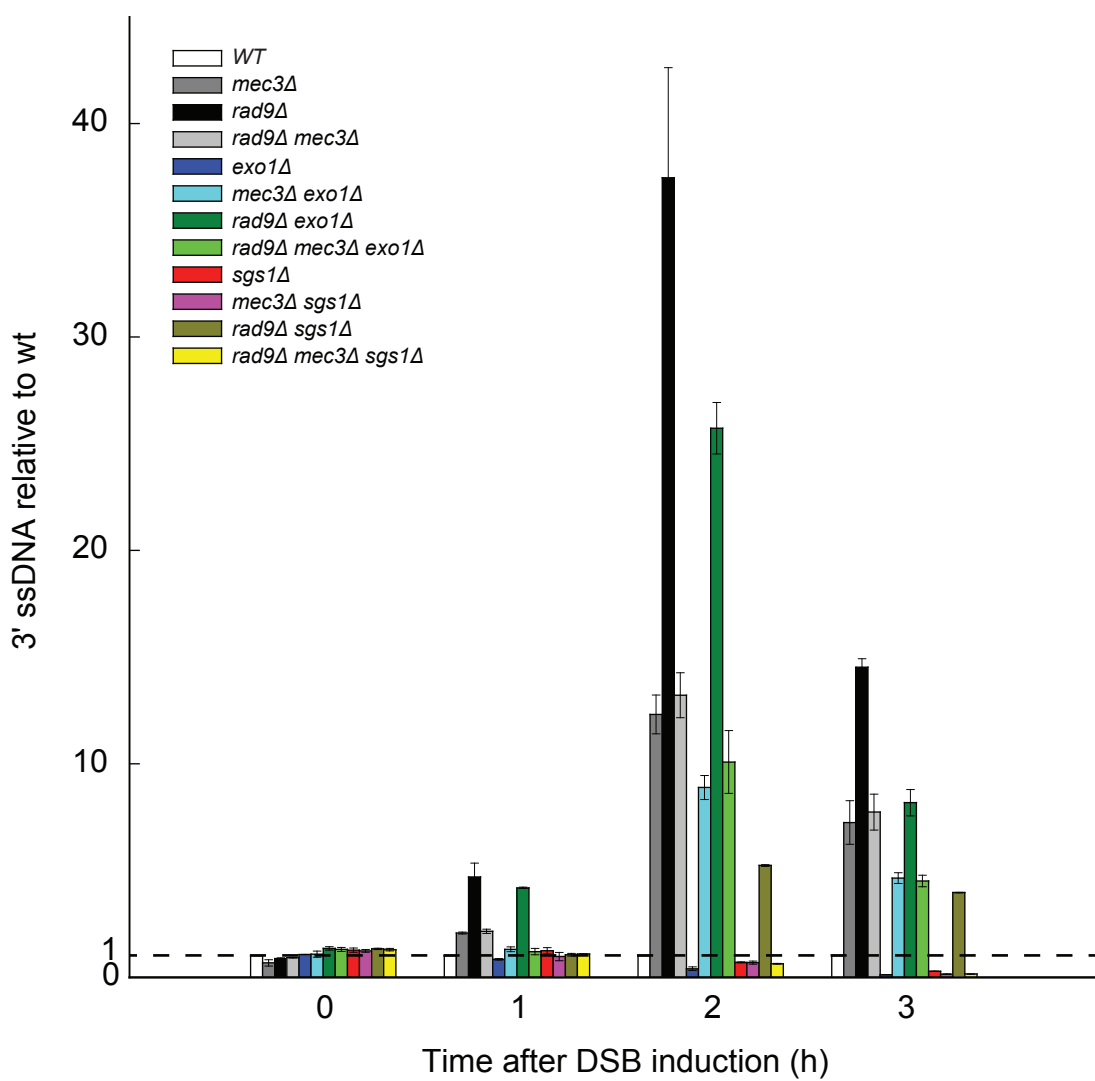



Figure S7

**A**

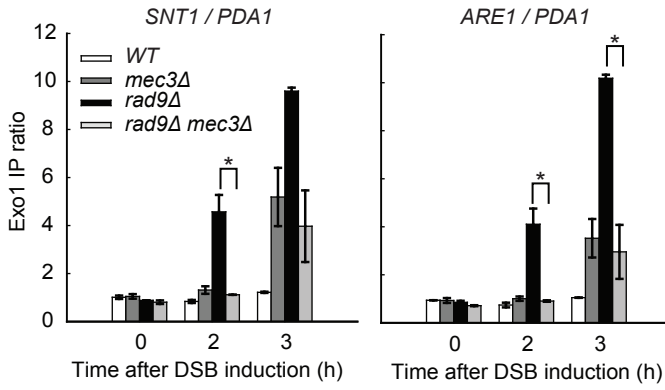

**B**

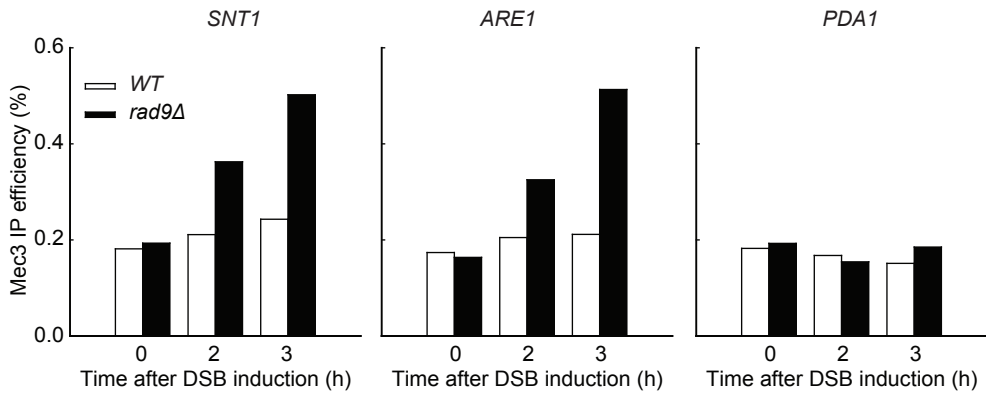

**C**

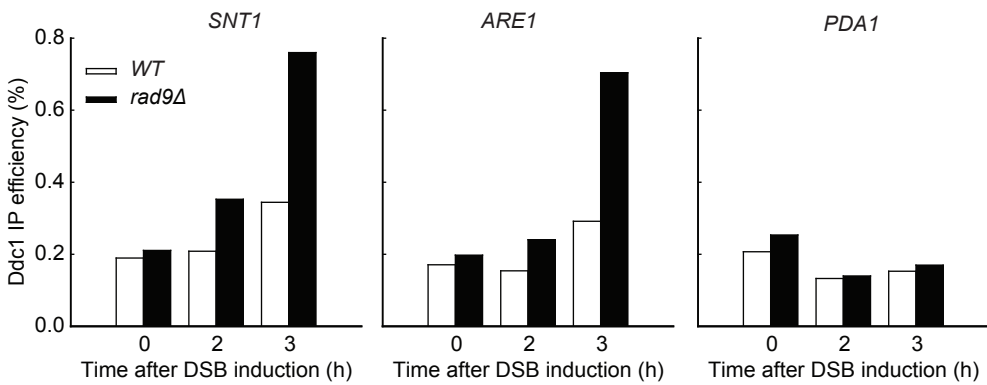

**D**

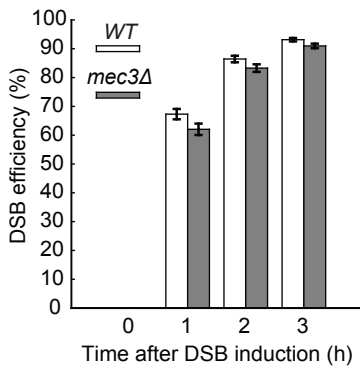

**E**

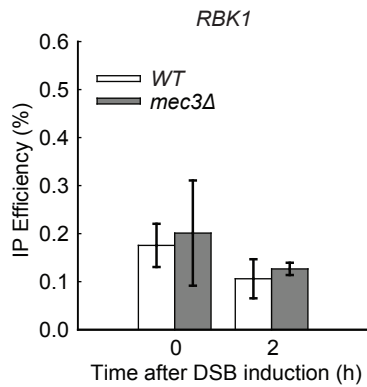

Table S1

| Strains          | Genotype                                                                                                                                             | Source                   |
|------------------|------------------------------------------------------------------------------------------------------------------------------------------------------|--------------------------|
| DLY7846/<br>7847 | <i>MATalpha hoΔ hml::ADE1 hmr::ADE1 ade1-100 leu2-3,112 trp1::hisG lys5 ura3-52 ade3::GAL::HO</i> (JKM179)                                           | M.Muzi-Falconi<br>Fig. 1 |
| DLY7848/<br>7849 | <i>MATalpha hoΔ hml::ADE1 hmr::ADE1 ade1-100 leu2-3,112 trp1::hisG lys5 ura3-52 ade3::GAL::HO rad9Δ::TRP1</i> (YFL419)                               | M.Muzi-Falconi<br>Fig. 3 |
| DLY7982/<br>7983 | <i>MATalpha hoΔ hml::ADE1 hmr::ADE1 ade1-100 leu2-3,112 trp1::hisG lys5 ura3-52 ade3::GAL::HO mec3Δ::HphMX</i>                                       | This work, Fig. 1        |
| DLY7986/<br>7987 | <i>MATalpha hoΔ hml::ADE1 hmr::ADE1 ade1-100 leu2-3,112 trp1::hisG lys5 ura3-52 ade3::GAL::HO rad9Δ::TRP1 mec3Δ::HphMX</i>                           | This work, Fig. 3        |
| DLY8299/<br>8300 | <i>MATalpha hoΔ hml::ADE1 hmr::ADE1 ade1-100 leu2-3,112 trp1::hisG lys5 ura3-52 ade3::GAL::HO exo1Δ::URA3</i>                                        | This work, Fig. 2        |
| DLY8301/<br>8302 | <i>MATalpha hoΔ hml::ADE1 hmr::ADE1 ade1-100 leu2-3,112 trp1::hisG lys5 ura3-52 ade3::GAL::HO rad9Δ::TRP1 exo1Δ::URA3</i>                            | This work, Fig. 5        |
| DLY8339/<br>8340 | <i>MATalpha hoΔ hml::ADE1 hmr::ADE1 ade1-100 leu2-3,112 trp1::hisG lys5 ura3-52 ade3::GAL::HO mec3Δ::HphMX exo1Δ::URA3</i>                           | This work, Fig. 2        |
| DLY8341/<br>8342 | <i>MATalpha hoΔ hml::ADE1 hmr::ADE1 ade1-100 leu2-3,112 trp1::hisG lys5 ura3-52 ade3::GAL::HO rad9Δ::TRP1 mec3Δ::HphMX exo1Δ::URA3</i>               | This work, Fig. 5        |
| DLY8304          | <i>MATalpha hoΔ hml::ADE1 hmr::ADE1 ade1-100 leu2-3,112 trp1::hisG lys5 ura3-52 ade3::GAL::HO pif1Δ::KanMX</i>                                       | This work, Fig. 2        |
| DLY8307          | <i>MATalpha hoΔ hml::ADE1 hmr::ADE1 ade1-100 leu2-3,112 trp1::hisG lys5 ura3-52 ade3::GAL::HO rad9Δ::TRP1 pif1Δ::KanMX</i>                           | This work, Fig. 5        |
| DLY8335          | <i>MATalpha hoΔ hml::ADE1 hmr::ADE1 ade1-100 leu2-3,112 trp1::hisG lys5 ura3-52 ade3::GAL::HO mec3Δ::HphMX pif1Δ::KanMX</i>                          | This work, Fig. 2        |
| DLY8337          | <i>MATalpha hoΔ hml::ADE1 hmr::ADE1 ade1-100 leu2-3,112 trp1::hisG lys5 ura3-52 ade3::GAL::HO rad9Δ::TRP1 mec3Δ::HphMX pif1Δ::KanMX</i>              | This work, Fig. 5        |
| DLY8393/<br>8394 | <i>MATalpha hoΔ hml::ADE1 hmr::ADE1 ade1-100 leu2-3,112 trp1::hisG lys5 ura3-52 ade3::GAL::HO pif1Δ::KanMX dna2Δ::NatMX</i>                          | This work, Fig. S3       |
| DLY8396/<br>8397 | <i>MATalpha hoΔ hml::ADE1 hmr::ADE1 ade1-100 leu2-3,112 trp1::hisG lys5 ura3-52 ade3::GAL::HO rad9Δ::TRP1 pif1Δ::KanMX dna2Δ::NatMX</i>              | This work, Fig. S4       |
| DLY8399/<br>8400 | <i>MATalpha hoΔ hml::ADE1 hmr::ADE1 ade1-100 leu2-3,112 trp1::hisG lys5 ura3-52 ade3::GAL::HO mec3Δ::HphMX pif1Δ::KanMX dna2Δ::NatMX</i>             | This work, Fig. S3       |
| DLY8402/<br>8403 | <i>MATalpha hoΔ hml::ADE1 hmr::ADE1 ade1-100 leu2-3,112 trp1::hisG lys5 ura3-52 ade3::GAL::HO rad9Δ::TRP1 mec3Δ::HphMX pif1Δ::KanMX dna2Δ::NatMX</i> | This work, Fig. S4       |
| DLY8578/<br>8579 | <i>MATalpha hoΔ hml::ADE1 hmr::ADE1 ade1-100 leu2-3,112 trp1::hisG lys5 ura3-52 ade3::GAL::HO sgs1Δ::KanMX exo1Δ::URA3</i>                           | This work, Fig. 2        |
| DLY8580/<br>8581 | <i>MATalpha hoΔ hml::ADE1 hmr::ADE1 ade1-100 leu2-3,112 trp1::hisG lys5 ura3-52 ade3::GAL::HO rad9Δ::TRP1 sgs1Δ::KanMX exo1Δ::URA3</i>               | This work, Fig. 5        |
| DLY8582/<br>8583 | <i>MATalpha hoΔ hml::ADE1 hmr::ADE1 ade1-100 leu2-3,112 trp1::hisG lys5 ura3-52 ade3::GAL::HO mec3Δ::HphMX sgs1Δ::KanMX exo1Δ::URA3</i>              | This work, Fig. 2        |
| DLY8584/<br>8585 | <i>MATalpha hoΔ hml::ADE1 hmr::ADE1 ade1-100 leu2-3,112 trp1::hisG lys5 ura3-52 ade3::GAL::HO rad9Δ::TRP1 mec3Δ::HphMX sgs1Δ::KanMX exo1Δ::URA3</i>  | This work, Fig. 5        |
| DLY8329/<br>8330 | <i>MATalpha hoΔ hml::ADE1 hmr::ADE1 ade1-100 leu2-3,112 trp1::hisG lys5 ura3-52 ade3::GAL::HO ddc1Δ::HphMX</i>                                       | This work, Fig. 1        |
| DLY8332/<br>8333 | <i>MATalpha hoΔ hml::ADE1 hmr::ADE1 ade1-100 leu2-3,112 trp1::hisG lys5 ura3-52 ade3::GAL::HO rad9Δ::TRP1 ddc1Δ::HphMX</i>                           | This work, Fig. 3        |
| DLY9504/<br>9505 | <i>MATalpha hoΔ hml::ADE1 hmr::ADE1 ade1-100 leu2-3,112 trp1::hisG lys5 ura3-52 ade3::GAL::HO Rad9-HA-KanMX</i>                                      | This work, Fig. 3        |
| DLY9506/<br>9507 | <i>MATalpha hoΔ hml::ADE1 hmr::ADE1 ade1-100 leu2-3,112 trp1::hisG lys5 ura3-52 ade3::GAL::HO mec3Δ::HphMX Rad9-HA-KanMX</i>                         | This work, Fig. 3        |
| DLY9509/<br>9511 | <i>MATalpha hoΔ hml::ADE1 hmr::ADE1 ade1-100 leu2-3,112 trp1::hisG lys5 ura3-52 ade3::GAL::HO ddc1Δ::HphMX Rad9-HA-KanMX</i>                         | This work, Fig. 3        |
| DLY7942/<br>7943 | <i>MATalpha hoΔ hml::ADE1 hmr::ADE1 ade1-100 leu2-3,112 trp1::hisG lys5 ura3-52 ade3::GAL::HO Dna2-Myc-KanMX</i>                                     | This work, Fig. 6        |
| DLY7945/<br>7946 | <i>MATalpha hoΔ hml::ADE1 hmr::ADE1 ade1-100 leu2-3,112 trp1::hisG lys5 ura3-52 ade3::GAL::HO rad9Δ::TRP1 Dna2-Myc-KanMX</i>                         | This work, Fig. 6        |
| DLY7988/<br>7989 | <i>MATalpha hoΔ hml::ADE1 hmr::ADE1 ade1-100 leu2-3,112 trp1::hisG lys5 ura3-52 ade3::GAL::HO mec3Δ::HphMX Dna2-Myc-KanMX</i>                        | This work, Fig. 6        |
| DLY7991/<br>7992 | <i>MATalpha hoΔ hml::ADE1 hmr::ADE1 ade1-100 leu2-3,112 trp1::hisG lys5 ura3-52 ade3::GAL::HO rad9Δ::TRP1 mec3Δ::HphMX Dna2-Myc-KanMX</i>            | This work, Fig. 6        |

Table S2

| Strains            | Genotype                                                                                                                                  | Source           |
|--------------------|-------------------------------------------------------------------------------------------------------------------------------------------|------------------|
| DLY8060/<br>8061   | <i>MATalpha hoΔ hml::ADE1 hmr::ADE1 ade1-100 leu2-3,112 trp1::hisG lys5 ura3-52 ade3::GAL::HO Exo1-Myc-KanMX</i>                          | This work, Fig.6 |
| DLY8075/<br>8076   | <i>MATalpha hoΔ hml::ADE1 hmr::ADE1 ade1-100 leu2-3,112 trp1::hisG lys5 ura3-52 ade3::GAL::HO rad9Δ::TRP1 Exo1-Myc-KanMX</i>              | This work, Fig.6 |
| DLY8187/<br>8188   | <i>MATalpha hoΔ hml::ADE1 hmr::ADE1 ade1-100 leu2-3,112 trp1::hisG lys5 ura3-52 ade3::GAL::HO mec3Δ::HphMX Exo1-Myc-KanMX</i>             | This work, Fig.6 |
| DLY8190/<br>8191   | <i>MATalpha hoΔ hml::ADE1 hmr::ADE1 ade1-100 leu2-3,112 trp1::hisG lys5 ura3-52 ade3::GAL::HO rad9Δ::TRP1 mec3Δ::HphMX Exo1-Myc-KanMX</i> | This work, Fig.6 |
| DLY8051            | <i>MATalpha hoΔ hml::ADE1 hmr::ADE1 ade1-100 leu2-3,112 trp1::hisG lys5 ura3-52 ade3::GAL::HO Mec3-Myc-KanMX</i>                          | This work, Fig.6 |
| DLY8066            | <i>MATalpha hoΔ hml::ADE1 hmr::ADE1 ade1-100 leu2-3,112 trp1::hisG lys5 ura3-52 ade3::GAL::HO rad9Δ::TRP1 Mec3-Myc-KanMX</i>              | This work, Fig.6 |
| DLY8054            | <i>MATalpha hoΔ hml::ADE1 hmr::ADE1 ade1-100 leu2-3,112 trp1::hisG lys5 ura3-52 ade3::GAL::HO Ddc1-Myc-KanMX</i>                          | This work, Fig.6 |
| DLY8069            | <i>MATalpha hoΔ hml::ADE1 hmr::ADE1 ade1-100 leu2-3,112 trp1::hisG lys5 ura3-52 ade3::GAL::HO rad9Δ::TRP1 Ddc1-Myc-KanMX</i>              | This work, Fig.6 |
| DLY9513/<br>9514   | <i>MAT a ade2-1 trp1-1 can1-100 leu2-3,112 his3-11,15 ura3 GAL+ psi+ ssd1-d2 RAD5 cdc13-1 cdc15-2 bar1 Rad9-HA-KanMX</i>                  | This work, Fig.3 |
| DLY9515/<br>9516   | <i>MAT a ade2-1 trp1-1 can1-100 leu2-3,112 his3-11,15 ura3 GAL+ psi+ ssd1-d2 RAD5 cdc13-1 cdc15-2 bar1 Rad9-HA-KanMX mec3Δ::TRP1</i>      | This work, Fig.3 |
| DLY9519/<br>9520   | <i>MAT a ade2-1 trp1-1 can1-100 leu2-3,112 his3-11,15 ura3 GAL+ psi+ ssd1-d2 RAD5 cdc13-1 cdc15-2 bar1 Rad9-HA-KanMX ddc1Δ::HphMX</i>     | This work, Fig.3 |
| DLY10009           | <i>MATalpha hoΔ hml::ADE1 hmr::ADE1 ade1-100 leu2-3,112 trp1::hisG lys5 ura3-52 ade3::GAL::HO sgs1Δ::KanMX</i>                            | This work, Fig.2 |
| DLY10013           | <i>MATalpha hoΔ hml::ADE1 hmr::ADE1 ade1-100 leu2-3,112 trp1::hisG lys5 ura3-52 ade3::GAL::HO mec3Δ::HphMX sgs1Δ::KanMX</i>               | This work, Fig.2 |
| DLY8577            | <i>MATalpha hoΔ hml::ADE1 hmr::ADE1 ade1-100 leu2-3,112 trp1::hisG lys5 ura3-52 ade3::GAL::HO rad9Δ::TRP1 sgs1Δ::KanMX</i>                | This work, Fig.5 |
| DLY8069            | <i>MATalpha hoΔ hml::ADE1 hmr::ADE1 ade1-100 leu2-3,112 trp1::hisG lys5 ura3-52 ade3::GAL::HO rad9Δ::TRP1 mec3Δ::HphMX sgs1Δ::KanMX</i>   | This work, Fig.5 |
| DLY10101           | <i>Mata-inc ura3::HOcs(V) LYS2 ade3::GALHO leu2-3,112 his3-11,15 trp1-1 ade2-1 can1-100</i>                                               | M.Kupiec, Fig.7  |
| DLY10108/<br>10109 | <i>Mata-inc ura3::HOcs(V) LYS2 ade3::GALHO leu2-3,112 his3-11,15 trp1-1 ade2-1 can1-100 mec3Δ::HphMX</i>                                  | This work, Fig.7 |
| DLY10242/<br>10243 | <i>Mata-inc ura3::HOcs(V) LYS2 ade3::GALHO leu2-3,112 his3-11,15 trp1-1 ade2-1 can1-100 rad9Δ::KanMX</i>                                  | This work, Fig.7 |
| DLY10244/<br>10245 | <i>Mata-inc ura3::HOcs(V) LYS2 ade3::GALHO leu2-3,112 his3-11,15 trp1-1 ade2-1 can1-100 rad9Δ::KanMX mec3Δ::HphMX</i>                     | This work, Fig.7 |
| DLY10108/<br>10109 | <i>Mata-inc ura3::HOcs(V) LYS2 ade3::GALHO leu2-3,112 his3-11,15 trp1-1 ade2-1 can1-100 Rad9-HA-KanMX</i>                                 | This work, Fig.7 |
| DLY10242/<br>10243 | <i>Mata-inc ura3::HOcs(V) LYS2 ade3::GALHO leu2-3,112 his3-11,15 trp1-1 ade2-1 can1-100 mec3Δ::HphMX Rad9-HA-KanMX</i>                    | This work, Fig.7 |

Table S3

| Loci                 | Primer                          | Sequence (5'-3')                                                                                                                      | Type                               |
|----------------------|---------------------------------|---------------------------------------------------------------------------------------------------------------------------------------|------------------------------------|
| <i>ARE1</i><br>3'    | M2646<br>M2651<br>M239<br>M2679 | TTTGATCCTCGCCCCACGCTCCTGGAC<br>TCGTCTGGAAGGGCACGTTGATG<br>AACCAGCGCAGCGGCATGTGT<br>AACCAGCGCAGCGGCATGTGTGTCGTTTTTTG                   | Probe<br>Reverse<br>Tag<br>Tagging |
| <i>YCR043C</i><br>3' | M2649<br>M2657<br>M235<br>M2674 | CTTGCTGTCCAAGCCAACATTCCCGCCA<br>GAGATAGGAGGAGAAAAACAGCAGAAGTATACTGA<br>TGCCCTCGCATCGCTCTCACA<br>TGCCCTCGCATCGCTCTCACAGTGAAAGACCG      | Probe<br>Reverse<br>Tag<br>Tagging |
| <i>SNT1</i><br>3'    | M2648<br>M2654<br>M97<br>M2660  | TCCCTTTACCGGCCCTCGCACTAGTCCA<br>TCAGCATGCTATTTCTCAAGGCACTCCTA<br>GATCTCGAGCTCGATATCGGATCCATT<br>GATCTCGAGCTCGATATCGGATCCATTGAAAAATTGA | Probe<br>Reverse<br>Tag<br>Tagging |
| <i>RBK1</i><br>3'    | M2647<br>M2652<br>M234<br>M2659 | CATGAGGCTAACAAGGCGCAACCGAACACA<br>AATCCAGATGAAGCCAACCCCATACC<br>AAGGAGCGCAGCGCCTGTACCA<br>AAGGAGCGCAGCGCCTGTACCAAAGGCAGCT             | Probe<br>Reverse<br>Tag<br>Tagging |
| <i>ARE1</i><br>5'    | M2646<br>M2650<br>M418<br>M2658 | TTTGATCCTCGCCCCACGCTCCTGGAC<br>TCCACCGAAAGGATGCTAGCAAGTATGT<br>ATGCTCGCAGAGCCCCTGGATCT<br>ATGCTCGCAGAGCCCCTGGATCTGGAAGGGCA            | Probe<br>Reverse<br>Tag<br>Tagging |
| <i>SNT1</i><br>5'    | M2648<br>M2655<br>M418<br>M2678 | TCCCTTTACCGGCCCTCGCACTAGTCCA<br>CAAAGCTGCCAACGGATCATTCCG<br>ATGCTCGCAGAGCCCCTGGATCT<br>ATGCTCGCAGAGCCCCTGGATCTCAAGGCACTC              | Probe<br>Reverse<br>Tag<br>Tagging |
| <i>YCR043C</i><br>5' | M2649<br>M2656<br>M235<br>M2662 | CTTGCTGTCCAAGCCAACATTCCCGCCA<br>CCGTTATGATCAAATCACGACAGTGAAAGAC<br>TGCCCTCGCATCGCTCTCACA<br>TGCCCTCGCATCGCTCTCACAGCAGAAGTATACT        | Probe<br>Reverse<br>Tag<br>Tagging |
| <i>RBK1</i><br>5'    | M2647<br>M2653<br>M234<br>M2675 | CATGAGGCTAACAAGGCGCAACCGAACACA<br>CCGATCCAAAGGCAGCTCCAA<br>AAGGAGCGCAGCGCCTGTACCA<br>AAGGAGCGCAGCGCCTGTACCAGATGAAGCC                  | Probe<br>Reverse<br>Tag<br>Tagging |

Table S4

| Loci                                          | Primer | Sequence (5'-3')                       | Type    |
|-----------------------------------------------|--------|----------------------------------------|---------|
| <i>GEA2</i><br>3'                             | M3638  | TCCTCCCCCAGCAAAGCGGCCACT               | Probe   |
|                                               | M3637  | CGACAGCGATGCGGAAATACTCTAAATTTA         | Reverse |
|                                               | M97    | GATCTCGAGCTCGATATCGGATCCATT            | Tag     |
|                                               | M3659  | GATCTCGAGCTCGATATCGGATCCATTGTTGAATGTGT | Tagging |
| <i>RIP1</i><br>3'                             | M3642  | AAGGGAGCCTCCGCGTCGCCGCA                | Probe   |
|                                               | M3640  | CGTTTTGCGCCATTTATCGGTCTTG              | Reverse |
|                                               | M520   | TGCCCTCGCATCGCTCTCGAA                  | Tag     |
|                                               | M3668  | TGCCCTCGCATCGCTCTCGAACCAACTATAGT       | Tagging |
| <i>EAF5</i><br>3'                             | M3632  | ACCGGTGCATCGCAACTGCAACCACATG           | Probe   |
|                                               | M3631  | CAGCAGATCCACTTTTGCCAGCATT              | Reverse |
|                                               | M233   | ATGCCCGCACCGCCTCATTG                   | Tag     |
|                                               | M3664  | ATGCCCGCACCGCCTCATTGAAGAACGGTAT        | Tagging |
| <i>NPP2</i><br>3'                             | M3635  | TTCCCGGCCGACGCAATGAGCGC                | Probe   |
|                                               | M3633  | CAACGCGAATGACGGTGAGCAT                 | Reverse |
|                                               | M239   | AACCAGCGCAGCGGCATGTGT                  | Tag     |
|                                               | M3654  | AACCAGCGCAGCGGCATGTGTCTCGAGGGT         | Tagging |
| Primers<br>flanking<br><i>MAT</i><br>HO site  | M3701  | AAAATGCAGCACGGAATATG                   | Forward |
|                                               | M3704  | TCCGTACCACGTAATTCAG                    | Reverse |
| Primers<br>flanking<br><i>URA3</i><br>HO site | M3707  | GCATTAGGTCCCAAATTTGTT                  | Forward |
|                                               | M3708  | TTGGCGGATAATGCCTTTAG                   | Reverse |
